# Supplementary material
Source: publisher site journal article supplement (https://en-cdn.bio-protocol.org/attached/file/20190513/3245%20Supplemental%20Data%20S1.docx)
Supplement: Supplementary file 1 [file 3245%20Supplemental%20Data%20S1.docx]

**Supplemental Data S1. Example of XCMS R script for LCMS data processing.**

rm(list=ls())

ls()

myDir = "setup your directory path here"

myResultDir = "myAlign"

### change working directory to your files

setwd(myDir)

### get working directory

(WD <- getwd())

library(xcms)

### Filtration and Peak Identification

xset <- xcmsSet(method='centWave', ppm=10, snthresh=3, prefilter=c(2,10), peakwidth=c(5,50), integrate=1, mzdiff=-0.001, verbose.columns=FALSE, fitgauss=FALSE, sleep=0, noise=1000)

xset

### Matching peaks across samples (grouping)

xset <- group(xset, method="density", bw=10, minsamp=3, mzwid=0.015, max=50, sleep=0)

xset

### Retention time correction

xset2 <- retcor(xset, method="obiwarp", plottype="deviation", profStep=.1)

xset2

### Re-grouping

xset3 <- group(xset2, bw=10)

xset3

### Integration of samples

xset4 <- fillPeaks(xset3)

xset4

### Construction of data section from xcms

matrix<-groupval(xset4, "medret", "into")

### Concatenate all relevant data

matrix.cbind<-cbind(groups(xset4), matrix)

### Visualisation of entire feature set

plot(matrix.cbind[,"rtmed"],matrix.cbind[,"mzmed"], col= "blue")

### Median fold change normalisation ###

normalize.medFC <- function(mat) {

medSam <- apply(mat, 1, median)

medSam[which(medSam==0)] <- 0.0001

mat <- apply(mat, 2, function(mat, medSam){

medFDiSmpl <- mat/medSam

vec<-mat/median(medFDiSmpl)

return(vec)

}, medSam)

return (mat)

}

xset4norm <- cbind(groups(xset4), normalize.medFC(groupval(xset4, "medret", "into")) )

head(xset4norm)

### Writing the files to .csv format

write.csv(matrix.cbind, file="output_RAW.csv")

write.csv(xset4norm, file="output_NORM.csv")
